# Supplementary material for: The verbal, non-verbal and structural bases of functional communication abilities in aphasia
Source: PubMed Central journal article supplement (PMC7660039; doi:10.1093/braincomms/fcaa118), 2020-08-04
Supplement: fcaa118_supplementary_data.pdf [file fcaa118_supplementary_data.pdf]

**The verbal, nonverbal and structural bases of functional communication  
abilities in aphasia**

Rahel Schumacher, Stefanie Bruehl, Ajay D. Halai, Matthew A. Lambon Ralph

**SUPPLEMENTARY MATERIAL**

## Contents

|                             |   |
|-----------------------------|---|
| Supplementary Table 1.....  | 3 |
| Supplementary Table 2.....  | 4 |
| Supplementary Table 3.....  | 5 |
| Supplementary Figure 1..... | 6 |

**Supplementary Table 1. Participant background information and functional assessment test scores.**

| Subject | Age  | Sex | Edu-<br>cation | years<br>post-stroke | lesion<br>volume | BDAE<br>classification | test<br>interval* | verbal<br>impairment <sup>#</sup> | nonverbal<br>impairment <sup>#</sup> | Scenario Test | ANELT | Patient<br>COAST | Patient<br>COAST 1-15 | Carer<br>COAST | Carer<br>COAST 1-15 |
|---------|------|-----|----------------|----------------------|------------------|------------------------|-------------------|-----------------------------------|--------------------------------------|---------------|-------|------------------|-----------------------|----------------|---------------------|
| 1       | 55   | m   | 17             | 9                    | 11915            | Broca                  | 6.4               | 57.1                              | 37.5                                 | 47.0          | 32.0  | 57.5             | 53.3                  | 52.5           | 45.0                |
| 2       | 55   | f   | 12             | 12                   | 9767             | Anomia                 | 6.2               | 28.6                              | 12.5                                 | 54.0          | 48.0  | 70.0             | 70.0                  | 61.3           | 53.3                |
| 3       | 71   | m   | 11             | 8                    | 8788             | MNF                    | 6.1               | 42.9                              | 43.8                                 | 53.0          | 40.0  | 42.5             | 41.7                  | 48.8           | 50.0                |
| 4       | 61   | m   | 11             | 17                   | 18392            | Broca                  | 6.1               | 50.0                              | 31.3                                 | 54.0          | 37.0  | 66.3             | 66.7                  | n/av           | n/av                |
| 5       | 72   | m   | 12             | 10                   | 41379            | Global                 | 5.3               | 92.9                              | 90.9                                 | 17.0          | 15.0  | 58.8             | 53.3                  | 41.3           | 33.3                |
| 6       | 47   | m   | 11             | 6                    | 8437             | Anomia                 | 3.0               | 28.6                              | 31.3                                 | 53.0          | 42.0  | 87.5             | 85.0                  | n/av           | n/av                |
| 7       | 76   | m   | 11             | 4                    | 22732            | MNF                    | 3.1               | 78.6                              | 87.5                                 | 24.0          | 14.0  | 56.3             | 58.3                  | 48.8           | 45.0                |
| 8       | 50   | f   | 11             | 8                    | 6975             | Anomia                 | 3.0               | 64.3                              | 43.8                                 | 51.0          | 36.0  | 71.3             | 71.7                  | n/av           | n/av                |
| 9       | 79   | f   | 11             | 7                    | 13577            | Anomia                 | 2.9               | 64.3                              | 70.0                                 | 51.0          | 35.0  | 76.3             | 76.7                  | 65.0           | 60.0                |
| 10      | 63   | f   | 19             | 6                    | 9159             | Anomia                 | 2.9               | 42.9                              | 6.3                                  | 51.0          | 42.0  | 68.4             | 78.3                  | n/av           | n/av                |
| 11      | 80   | m   | 13             | 5                    | 34242            | MNF                    | 3.0               | 71.4                              | 43.8                                 | 38.0          | 19.0  | 78.8             | 76.7                  | 51.3           | 51.7                |
| 12      | 71   | m   | 11             | 4                    | 3311             | Anomia                 | 2.9               | 50.0                              | 18.8                                 | 50.0          | 47.0  | 63.8             | 66.7                  | 71.3           | 66.7                |
| 13      | 62   | m   | 11             | 5                    | 16433            | Anomia                 | 2.9               | 50.0                              | 18.8                                 | 52.0          | 40.0  | 61.3             | 58.3                  | n/av           | n/av                |
| 14      | 70   | m   | 13             | 7                    | 33239            | Global                 | 2.9               | 100.0                             | 31.3                                 | 29.0          | 11.0  | 51.3             | 46.7                  | 48.8           | 50.0                |
| 15      | 52   | m   | 13             | 8                    | 22948            | Anomia                 | 2.7               | 78.6                              | 31.3                                 | 51.0          | 25.0  | 66.3             | 65.0                  | 53.8           | 60.0                |
| 16      | 48   | f   | 16             | 4                    | 3897             | Conduction             | 2.6               | 71.4                              | 37.5                                 | 50.0          | 29.0  | 40.0             | 46.7                  | 50.0           | 50.0                |
| 17      | 84   | m   | 10             | 3                    | 12131            | Broca                  | 2.6               | 78.6                              | 44.4                                 | 52.0          | n/av  | n/av             | n/av                  | n/av           | n/av                |
| 18      | 46   | f   | 13             | 5                    | 18948            | Anomia                 | 2.2               | 57.1                              | 18.8                                 | 52.0          | 37.0  | 61.3             | 65.0                  | 36.3           | 40.0                |
| 19      | 75   | f   | 11             | 6                    | 23863            | TMA                    | 2.2               | 57.1                              | 31.3                                 | 52.0          | 32.0  | 70.0             | 68.3                  | 68.8           | 61.7                |
| 20      | 76   | f   | 11             | 15                   | 12057            | MNF                    | 2.1               | 85.7                              | 68.8                                 | 35.0          | 18.0  | 62.5             | 63.3                  | 53.8           | 53.3                |
| 21      | 45   | f   | 16             | 3                    | 175              | Anomia                 | 1.8               | 21.4                              | 25.0                                 | 52.0          | 47.0  | 67.5             | 76.7                  | n/av           | n/av                |
| 22      | 66   | m   | 11             | 4                    | 33239            | MNF                    | 1.8               | 85.7                              | 50.0                                 | 47.0          | 20.0  | 48.8             | 45.0                  | 42.5           | 31.7                |
| 23      | 69   | m   | 11             | 5                    | 31317            | MNF                    | 2.1               | 92.9                              | 37.5                                 | 24.0          | 10.0  | 72.5             | 70.0                  | 60.0           | 65.0                |
| 24      | 81   | m   | 11             | 6                    | 33678            | MNF                    | 1.8               | 100.0                             | 57.1                                 | 19.0          | n/ad  | n/ad             | n/ad                  | 48.8           | 46.7                |
| 25      | 47   | m   | 11             | 3                    | 10409            | Anomia                 | 1.8               | 42.9                              | 31.3                                 | 51.0          | 41.0  | 65.0             | 66.7                  | n/av           | n/av                |
| 26      | 59   | f   | 11             | 24                   | 12699            | Anomia                 | 1.7               | 71.4                              | 37.5                                 | 51.0          | 38.0  | 58.8             | 61.7                  | n/av           | n/av                |
| 27      | 68   | m   | 11             | 2                    | 4879             | Conduction             | 1.6               | 50.0                              | 18.8                                 | 45.0          | 32.0  | 61.3             | 60.0                  | 67.5           | 61.7                |
| 28      | 53   | m   | 11             | 7                    | 37822            | Global                 | 1.6               | 100.0                             | 25.0                                 | 36.0          | 10.0  | 62.5             | 58.3                  | 32.5           | 35.0                |
| 29      | 88   | m   | 9              | 2                    | 8528             | Anomia                 | 1.6               | 57.1                              | 41.7                                 | 51.0          | 37.0  | 73.8             | 66.7                  | 58.8           | 61.7                |
| 30      | 75   | m   | 11             | 11                   | 36877            | Broca                  | 1.6               | 92.9                              | 73.3                                 | 38.0          | n/ad  | 60.0             | 58.3                  | 46.3           | 50.0                |
| 31      | 67   | m   | 17             | 2                    | 6557             | Conduction             | 1.2               | 64.3                              | 31.3                                 | 49.0          | 36.0  | 62.5             | 56.7                  | 53.8           | 51.7                |
| 32      | 57   | m   | 16             | 2                    | 6974             | Anomia                 | 1.1               | 57.1                              | 12.5                                 | 50.0          | 39.0  | 82.5             | 83.3                  | 73.7           | 75.0                |
| 33      | 66   | m   | 10             | 7                    | 6607             | Anomia                 | 0.9               | 50.0                              | 6.3                                  | 54.0          | 42.0  | 68.8             | 73.3                  | 78.8           | 76.7                |
| 34      | 50   | m   | 19             | 2                    | 4538             | Anomia                 | 0.8               | 35.7                              | 6.3                                  | 53.0          | 42.0  | 78.8             | 80.0                  | 83.8           | 81.7                |
| 35      | 51   | m   | 11             | 3                    | 14681            | Anomia                 | 0.4               | 35.7                              | 37.5                                 | 52.0          | 46.0  | 87.5             | 88.3                  | 81.3           | 71.7                |
| 36      | 56   | f   | 11             | 2                    | 10081            | MNF                    | 0.4               | 100.0                             | 50.0                                 | 45.0          | 10.0  | 31.3             | 36.7                  | 71.3           | 73.3                |
| 37      | 69   | m   | 12             | 7                    | 37907            | Broca/ MNF             | 0.4               | 85.7                              | 50.0                                 | 40.0          | 18.0  | 33.8             | 33.3                  | 48.8           | 48.3                |
| Mean    | 63.8 |     | 12.4           | 6.5                  | 17004.3          |                        | 2.5               | 64.7                              | 37.6                                 | 45.2          | 31.4  | 63.6             | 63.6                  | 57.1           | 55.4                |
| SD      | 12.0 |     | 2.5            | 4.6                  | 11994.2          |                        | 1.6               | 22.6                              | 21.0                                 | 10.5          | 12.3  | 13.3             | 13.5                  | 13.4           | 13.2                |

Notes: f = female, m= male, MNF = Mixed Nonfluent, n/av = not available (organisational), n/ad = not administered (based on performance in other tests)

\*time (years) between assessment time points 1 and 2, see also Supplementary Table 2; # impairment = percentage of impaired test scores (more than 1.5 standard deviations below the mean of controls), based on all available tests, see also Supplementary Table 2

**Supplementary Table 2. Tests, components, and loadings from the principal component analysis including the verbal and nonverbal background tests.**

|    | <b>Test measure</b>                   | <b>Phonology</b> | <b>Semantics</b> | <b>Speech Quanta</b> | <b>Shift-Update</b> | <b>Inhibit-Generate</b> | <b>Speed</b> |
|----|---------------------------------------|------------------|------------------|----------------------|---------------------|-------------------------|--------------|
| v  | Digit span forward <sup>1</sup>       | <b>.898</b>      | .170             |                      |                     | -.139                   |              |
| v  | Repetition <sup>1</sup>               | <b>.844</b>      | .181             | .138                 | .246                |                         | .116         |
| v  | Naming <sup>1</sup>                   | <b>.827</b>      | .302             | .148                 | .166                |                         | .237         |
| v  | Digit span backward <sup>1</sup>      | <b>.775</b>      |                  | .382                 |                     |                         |              |
| v  | Spoken comprehension <sup>1</sup>     | <b>.630</b>      | .459             | .168                 | .441                |                         | .103         |
| v  | Minimal Pairs <sup>1</sup>            | <b>.615</b>      |                  | -.228                |                     | <b>.572</b>             |              |
| v  | Word-picture matching <sup>1</sup>    | <b>.562</b>      | <b>.611</b>      | .190                 | .189                |                         | -.208        |
| v  | Synonym judgment <sup>1</sup>         | .420             | <b>.758</b>      | .317                 | .244                |                         |              |
| v  | Camel & Cactus Pictures <sup>1</sup>  | .334             | <b>.717</b>      |                      | .165                | .491                    |              |
| nv | Design Fluency <sup>2</sup>           |                  | <b>.595</b>      | .177                 | .222                | .431                    | .279         |
| v  | Cookie Theft Token <sup>1</sup>       |                  | .214             | <b>.871</b>          | .104                | .188                    | -.108        |
| v  | Cookie Theft MLU <sup>1</sup>         | .304             | .221             | <b>.792</b>          | .328                |                         |              |
|    | Cookie Theft WPM <sup>1</sup>         | .415             |                  | <b>.652</b>          | .155                | .108                    | -.115        |
| nv | Brixton correct <sup>1</sup>          | .302             |                  | .142                 | <b>.782</b>         | .252                    | -.171        |
| nv | Tower of London planning <sup>2</sup> |                  |                  | .292                 | <b>.745</b>         |                         | .369         |
| nv | Divided accuracy <sup>2</sup>         | .248             | .258             |                      | <b>.708</b>         | .303                    |              |
| nv | Trail Making numbers <sup>2</sup>     | .129             | .350             | .197                 | <b>.683</b>         |                         | .243         |
| nv | Kramer categories <sup>2</sup>        |                  | .131             | .341                 |                     | <b>.778</b>             |              |
| nv | GoNoGo accuracy <sup>2</sup>          | -.219            |                  |                      | .259                | <b>.712</b>             | .208         |
| nv | Raven B <sup>1</sup>                  |                  | .140             |                      | .334                | <b>.694</b>             | .288         |
| nv | GoNoGo RT <sup>2</sup>                | .262             |                  |                      |                     | .145                    | <b>.842</b>  |
| nv | Alertness RT <sup>2</sup>             | -.112            |                  | -.226                | .124                | .260                    | <b>.705</b>  |

Notes: v (verbal) and nv (nonverbal) in the leftmost column indicates if the respective test was used to compute the verbal or nonverbal impairment score (see also note in Supplementary Table 1). Superscript numbers indicate in which testing phase the assessment was administered. MLU = mean length of utterance, RT = reaction time, WPM = words per minute, loadings > 0.5 are printed in bold, loadings < 0.1 are not shown

**Supplementary Table 3. COAST components and item loadings from principal component analysis, separately for patient and carer versions.**

| Nr | Item                   | Patient COAST             |                                   |                          |                      |                                  |             | Carer COAST |                        |                                  |                          |                         |
|----|------------------------|---------------------------|-----------------------------------|--------------------------|----------------------|----------------------------------|-------------|-------------|------------------------|----------------------------------|--------------------------|-------------------------|
|    |                        | verbal communi-<br>cation | improvement<br>&<br>participation | basic communi-<br>cation | confidence &<br>mood | written<br>language &<br>numbers | hobbies     | severity    | own quality<br>of life | written<br>language &<br>numbers | basic communi-<br>cation | complex<br>interactions |
| 1  | yes-no                 | .121                      | .279                              | <b>.802</b>              |                      |                                  | .192        |             |                        | .175                             | <b>.760</b>              | .141                    |
| 2  | use other ways         | .170                      |                                   | <b>.703</b>              | .161                 | .199                             | -.404       | <b>.707</b> | .177                   | .266                             | .338                     | -.147                   |
| 3  | chat familiar          | <b>.742</b>               | .206                              | .105                     | .149                 |                                  |             | <b>.889</b> | .144                   | .163                             |                          |                         |
| 4  | chat unfamiliar        | <b>.602</b>               | .333                              |                          | .479                 |                                  | .179        | <b>.678</b> |                        | .484                             |                          | .235                    |
| 5  | chat group             | <b>.710</b>               | .234                              |                          | .385                 | .160                             |             | <b>.660</b> | .283                   |                                  |                          | .561                    |
| 6  | express long sentences | <b>.795</b>               |                                   | .275                     |                      | .255                             | -.122       | <b>.802</b> |                        | .116                             | .140                     |                         |
| 7  | understand simple      | <b>.510</b>               | .185                              | .238                     | -.115                |                                  |             |             |                        | <b>.630</b>                      | .542                     | .312                    |
| 8  | show not understand    | .174                      | .452                              | <b>.653</b>              |                      |                                  |             |             | .186                   |                                  | <b>.843</b>              |                         |
| 9  | change subject         | <b>.799</b>               |                                   | .131                     |                      | .307                             | .121        | .111        |                        |                                  | .307                     | <b>.803</b>             |
| 10 | reading                | .172                      | .119                              |                          | .173                 | <b>.796</b>                      |             | .162        |                        | <b>.841</b>                      |                          |                         |
| 11 | writing                | .211                      |                                   | .273                     | -.202                | <b>.671</b>                      |             | .357        |                        | <b>.643</b>                      | .221                     | -.191                   |
| 12 | money                  |                           |                                   |                          | .364                 | <b>.730</b>                      | .179        | -.111       | .217                   | <b>.794</b>                      |                          | .105                    |
| 13 | changed since stroke   |                           | <b>.847</b>                       | .119                     |                      | .355                             |             | <b>.753</b> | .272                   | -.129                            |                          |                         |
| 14 | communication now      | .325                      | <b>.733</b>                       | .171                     | -.103                | .124                             | -.335       | <b>.830</b> |                        |                                  |                          | .120                    |
| 15 | influence confidence   |                           |                                   | -.101                    | <b>.848</b>          |                                  |             | <b>.590</b> | -.132                  | .470                             |                          |                         |
| 16 | family life            | .326                      | <b>.723</b>                       | .312                     | .266                 | -.106                            | .104        | <b>.667</b> | .463                   | .128                             | -.127                    | .111                    |
| 17 | social life            | .145                      | <b>.669</b>                       | -.113                    | .313                 |                                  | .330        | .402        | <b>.782</b>            |                                  | .307                     | -.112                   |
| 18 | interest hobbies       | .264                      | .209                              | .213                     | .101                 | .160                             | <b>.832</b> |             | <b>.895</b>            |                                  |                          | .114                    |
| 19 | worried unhappy        | .166                      | .128                              | .303                     | <b>.761</b>          | .166                             |             |             | .459                   | .225                             | -.213                    | <b>.653</b>             |
| 20 | quality of life        | .115                      | <b>.708</b>                       | .366                     | .291                 | -.122                            |             | .164        | <b>.834</b>            |                                  | .158                     | .251                    |

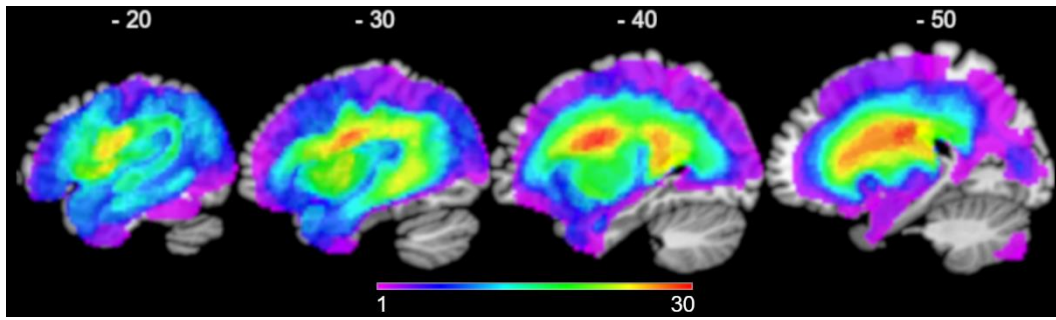

**Supplementary Figure 1. Overlap of the 37 patients' lesions.**
